# Supplementary material for: Comparison of three high-flow single-stage impaction-based air samplers for bacteria quantification: DUO SAS SUPER 360, SAMPL'AIR and SPIN AIR
Source: Royal Society of Chemistry journal article supplement (doi:10.1039/c1ay05562c), 2011-12-16
Supplement: c1ay05562c.pdf [file c1ay05562c.pdf]

## Comparison of three high-flow single-stage impaction-based air samplers for bacteria quantification: DUO SAS SUPER 360, SAMPL' AIR and SPIN AIR

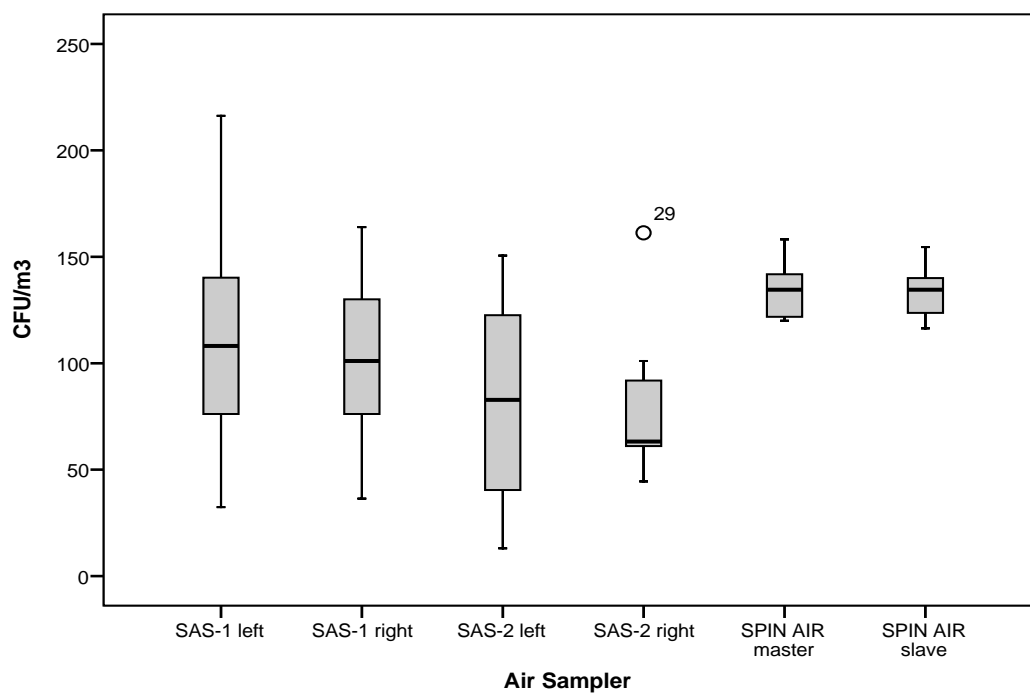

*Figure 1.* Box plot of the CFU/m<sup>3</sup> data obtained in experiment A.

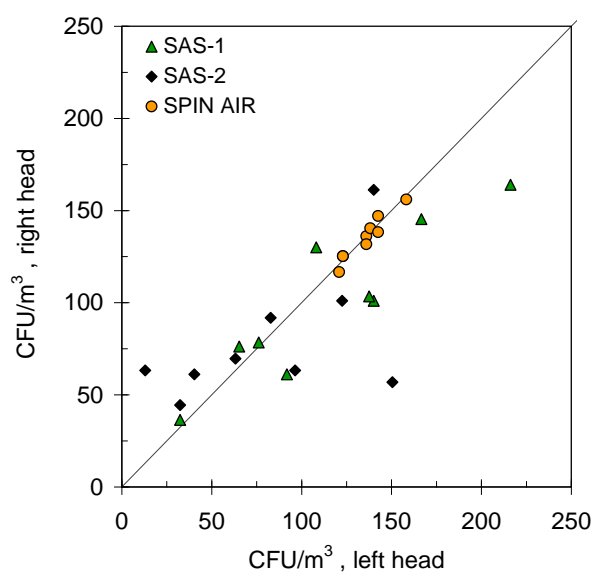

*Figure 2.* Identity plot for right and left sampling heads of DUO SAS and SPIN AIR impactors in experiment A.

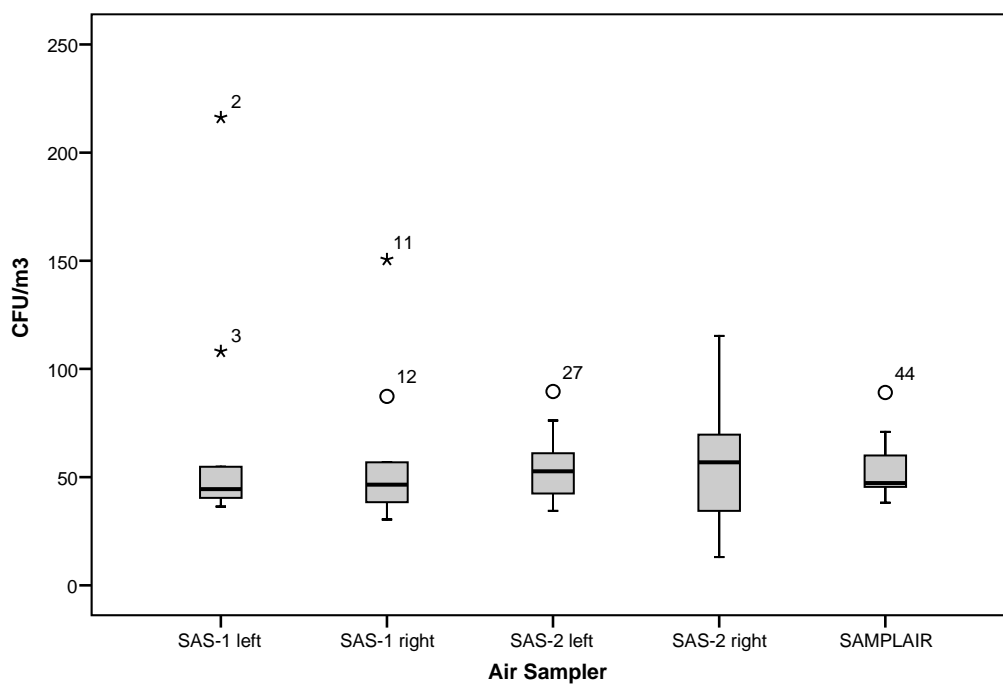

**Figure 3.** Box plot of the CFU/m<sup>3</sup> data obtained in experiment B.

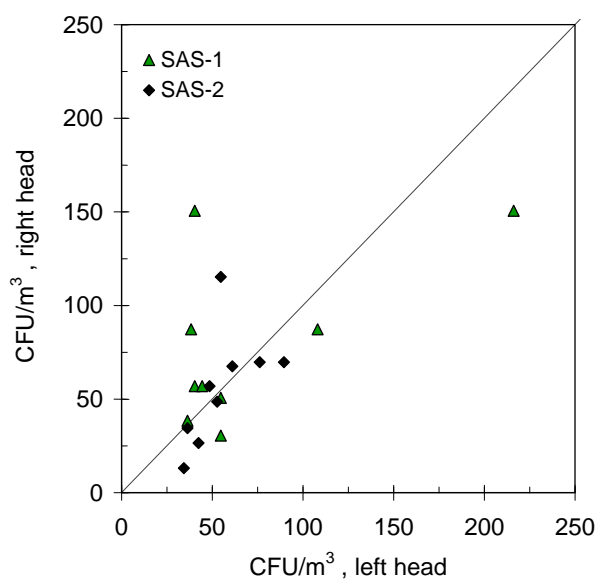

**Figure 4.** Identity plot for right and left sampling heads of DUO SAS impactor in experiment. B.

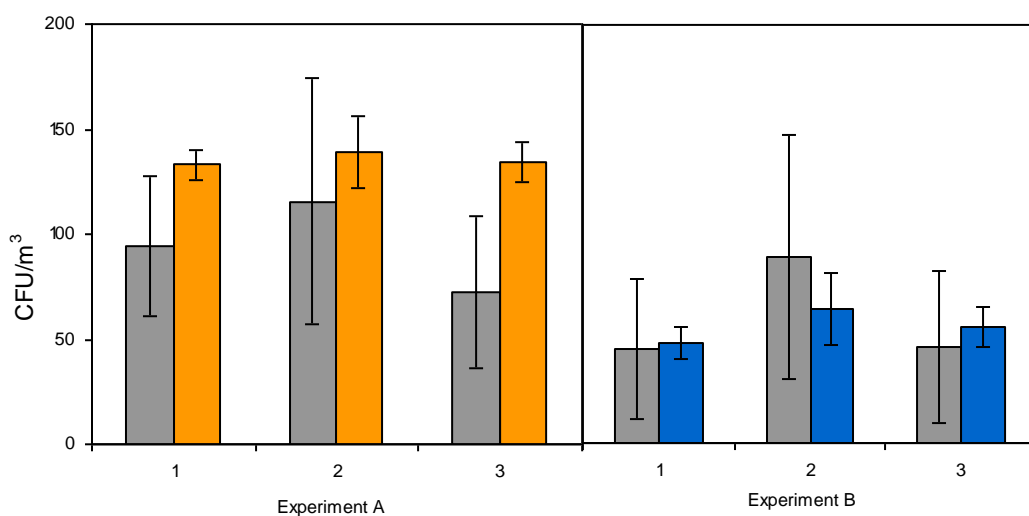

**Figure 5.** Bacteria concentration mean values obtained in the three possible positions during the experiments; A: DUO SAS (left, grey) vs SAMPL' AIR (right, orange), B: DUO SAS (left, grey) vs SPIN AIR (right, blue).

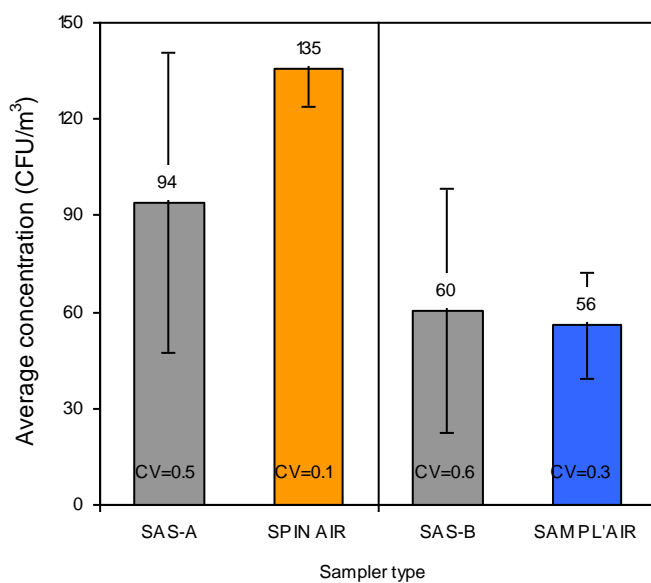

**Figure 6.** Bacteria concentration mean values obtained with the three sampler models in all experiments and coefficient of variation
